# Supplementary material for: Structural revolution of PVDF crystallized on MWCNT film on a gradient temperature stage and its dielectric properties
Source: Royal Society of Chemistry journal article supplement (doi:10.1039/d4ce00467a), 2024-01-01
Supplement: d4ce00467a1.pdf [file d4ce00467a1.pdf]

## Supporting Information

### Structural revolution of PVDF crystallized on MWCNT film on a gradient temperature and its dielectric properties

Shuhui Li<sup>a</sup>, Hai Wang<sup>a</sup>, Xiaobin Liang<sup>b\*</sup>, Meijie Qu<sup>a</sup>, Mingshuai Fan<sup>a</sup>, Rui Zhang<sup>a</sup>, Ken Nakajima

<sup>b</sup>, Yuezhen Bin<sup>a\*</sup>

<sup>a</sup> Department of Polymer Science and Engineering, School of Chemical Engineering, Dalian University of Technology, Dalian 116024, PR China

<sup>b</sup> Department of Chemical Science and Engineering, School of Materials and Chemical Technology, Tokyo Institute of Technology, Tokyo 152-8552, Japan

<sup>a\*</sup>E-mail: binyz@dlut.edu.cn

<sup>b\*</sup>E-mail: liang.x.ac@m.titech.ac.jp

Table S1. The sample names under different preparation conditions

| $T_c$ (°C) \ Nucleus | MWCNT    | No nucleus |
|----------------------|----------|------------|
| 117                  | PCNT-117 | PN-117     |
| 111                  | PCNT-111 | PN-111     |
| 104                  | PCNT-104 | PN-104     |
| ...                  | ...      | ...        |
| 51                   | PCNT-51  | PN-51      |
| 45                   | PCNT-45  | PN-45      |

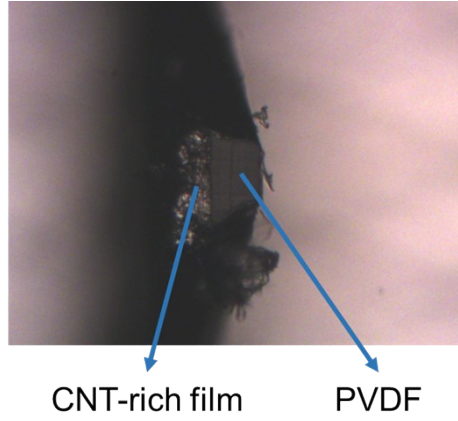

Figure S1. The samples' observation surface after slicing for AFM.

Table S2. The detail crystal characteristics of PN.

| Samples | $X_c/\%$ | $q/\text{nm}^{-1}$ | $L/\text{nm}$ | $L_c/\text{nm}$ | $L_a/\text{nm}$ |
|---------|----------|--------------------|---------------|-----------------|-----------------|
| PN-117  | 43.4     | 0.535              | 11.7          | 5.1             | 6.6             |
| PN-111  | 44.4     | 0.553              | 11.4          | 5.0             | 6.3             |
| PN-104  | 43.4     | 0.559              | 11.2          | 4.9             | 6.3             |
| PN-98   | 43.2     | 0.588              | 10.7          | 4.6             | 6.1             |
| PN-93   | 42.2     | 0.599              | 10.5          | 4.4             | 6.1             |
| PN-87   | 41.1     | 0.626              | 10.0          | 4.1             | 5.9             |
| PN-81   | 35.6     | 0.663              | 9.5           | 3.4             | 6.1             |
| PN-71   | 28.7     | 0.79               | 8.0           | 2.3             | 5.7             |
| PN-61   | 27.1     | 0.801              | 7.8           | 2.1             | 5.7             |

$X_c$  is calculated by equation (2):

$$X_c = \frac{\sum A_{cryst}}{(\sum A_{cryst} + \sum A_{amorp})} \quad (2)$$

where  $A_{cryst}$  and  $A_{amorp}$  are the peaks area of crystal and amorphous regions.

$X_c$  can also be calculated from DSC by equation (3):

$$X_c = \frac{\Delta H}{\Delta H_0}$$

where  $X_c$  is crystallinity;  $\Delta H$  is the enthalpy of melting of PVDF samples, expressed in

J/g;  $\Delta H_0$  is the standard enthalpy of melting of 100% crystallinity PVDF, expressed in 104.6 J/g.

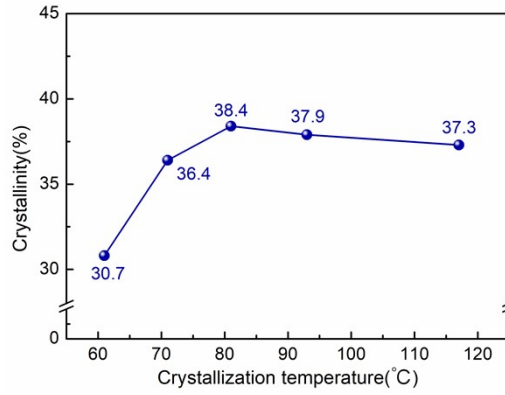

Figure S2. Crystallinity of PN crystallized at different  $T_c$  calculated from DSC.

The crystal structure was composed of lamellar regions and amorphous regions which was shown in Figure 5(e). The  $q$  value was calculated by equation (3):

$$q = 4\pi \sin\theta / \lambda \quad (3)$$

where  $\theta$  is the Bragg angle;  $\lambda$  is the wavelength of X-ray,  $\lambda=0.154$  nm.

The  $L$  of PVDF is corresponding to  $q$  value, which is calculated by equation (4):

$$L = 2\pi / q \quad (4)$$

The  $L_c$  is calculated by equation (5):

$$L_c = L \cdot X_c \quad (5)$$

The  $L_a$  is calculated by equation (6):

$$L_a = L - L_c \quad (6)$$

where  $L$  is long period,  $L_c$  is lamellar thickness,  $L_a$  is amorphous thickness,  $q$  is scattering vector,  $X_c$  is crystallinity.

Table S3. The calculated peak area ratio of  $\gamma$  (021) plane.

| $T_c$ (°C) | 117  | 111  | 104  | 98    | 93   | 87   | 81   | 71    | 61    |
|------------|------|------|------|-------|------|------|------|-------|-------|
| PN         | 1.7% | 1.0% | 1.6% | 2.7%  | 3.6% | 4.6% | 8.5% | 14.2% | 15.4% |
| PCNT       | 7.0% | 7.4% | 8.8% | 10.6% | 9.0% | 9.4% | 8.9% | 14.2% | 17.1% |

Table S4. The detail crystal characteristics of PCNT.

| Samples  | $X_c$ /% | $q$ /nm <sup>-1</sup> | $L$ /nm | $L_c$ /nm | $L_a$ /nm |
|----------|----------|-----------------------|---------|-----------|-----------|
| PCNT-117 | 44.8     | 0.544                 | 11.5    | 5.2       | 6.4       |
| PCNT-111 | 45.2     | 0.580                 | 10.8    | 4.9       | 5.9       |
| PCNT-104 | 43.7     | 0.604                 | 10.4    | 4.6       | 5.9       |
| PCNT-98  | 41.5     | 0.613                 | 10.2    | 4.3       | 6.0       |
| PCNT-93  | 40.6     | 0.646                 | 9.7     | 3.9       | 5.8       |
| PCNT-87  | 38.5     | 0.665                 | 9.5     | 3.6       | 5.8       |
| PCNT-81  | 38.4     | 0.660                 | 9.5     | 3.7       | 5.9       |
| PCNT-71  | 31.7     | 0.778                 | 8.1     | 2.6       | 5.5       |
| PCNT-61  | 28.3     | 0.711                 | 8.8     | 2.5       | 6.3       |

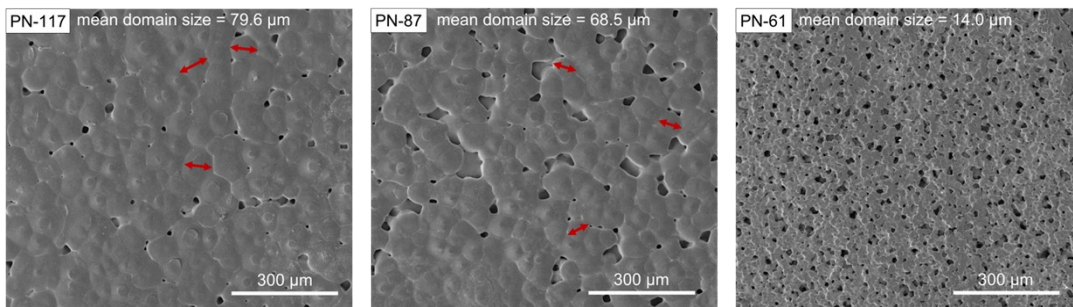

Figure S3. SEM of PVDF films which was crystallized at 117 °C, 87 °C and 61 °C.
